# Supplementary material
Source: PubMed Central journal article supplement (PMC3754150)
Supplement: AEM.01443-13_zam999104687so1.pdf [file AEM.01443-13_zam999104687so1.pdf]

**Supplementary Table S1. Set of randomly selected clinical isolates\* used to calculate discriminatory index of PCR-based genotyping methods**

| Name or number       | Place of isolation  | Time of isolation | hsp65 type (code)† | LSP-MVR type‡ | 8-locus MIRU type§ | rep-PCR type** |
|----------------------|---------------------|-------------------|--------------------|---------------|--------------------|----------------|
| BR80                 | São Paulo, Brazil   | 1998              | CCAGCGA (1)        | 1111-5282     | 2522-1228          | unique         |
| W120                 | Southern California | 1989              | CCAGCGA (1)        | 2221-4282     | 2422-1228          | unique         |
| W214                 | Southern California | 1991              | CCAGCGA (1)        | 1221-4282     | 2422-1228          | B              |
| W272                 | Southern California | 1991              | CCGGCGG (2)        | 2112-5483     | 0543-1228          | not done       |
| W41                  | Southern California | 1990              | CCAGCGA (1)        | 1212-4282     | 2422-1228          | X              |
| W61                  | Southern California | 1990              | CCAGCGA (1)        | 2211-3383     | 3333-1228          | unique         |
| 9033                 | Montreal, Canada    | 1999-2003         | GGGGGGG (16)       | 211n-1n81     | n1p1-nn(>12)8      | not done       |
| NET11 (NLA009600829) | Netherlands         | 1996              | CGGCGGG (3)        | 1n11-5282     | 2522-1228          | not done       |
| NET17 (NLA009600751) | Netherlands         | 1996              | CCAGCGA (1)        | 1121-3282     | 2322-1228          | C              |
| NET19 (NLA009601234) | Netherlands         | 1996              | CCAGCGA (1)        | 1121-2282     | 2222-1228          | T              |
| NET20 (NLA009601375) | Netherlands         | 1996              | CGGCGGG (3)        | 1111-4282     | 2422-1228          | unique         |
| NET38 (NLA009601391) | Netherlands         | 1996              | CCAGCGA (1)        | 1111-2282     | 2222-1228          | E              |
| NET39 (NLA009601393) | Netherlands         | 1996              | CCAGCGA (1)        | 1111-2282     | 2222-1228          | E              |
| NET56 (NLA009601899) | Netherlands         | 1996              | CCAGCGA (1)        | 1121-3282     | 2322-1228          | C              |
| NET61 (NLA009601392) | Netherlands         | 1996              | CCAGCGA (1)        | 1111-2282     | 2222-1228          | F              |
| NET63 (NLA009600536) | Netherlands         | 1996              | CGGCGGG (3)        | 1111-4282     | 2422-1228          | F              |
| NET67 (NLA009600205) | Netherlands         | 1995              | CGGCGGG (3)        | 1111-4282     | 2422-1228          | I              |
| NET71 (NLA009600531) | Netherlands         | 1996              | CCAGCGA (1)        | 1111-2282     | 2222-1228          | F              |
| NET76 (NLA009601555) | Netherlands         | 1996              | CCAGCGA (1)        | 1111-2282     | 2222-1228          | F              |
| HMC10                | Seattle, U.S.A.     | 1999-2001         | CCAGCGA (1)        | 1221-2282     | 2222-1228          | unique         |
| HMC11                | Seattle, U.S.A.     | 1999-2001         | CCAGCGA (1)        | 1n12-4282     | 2422-1218          | not done       |
| HMC19                | Seattle, U.S.A.     | 1999-2001         | CCAGCGA (1)        | 1121-3282     | 2322-1228          | P              |
| HMC20                | Seattle, U.S.A.     | 1999-2001         | CCGGCGG (2)        | 2212-3383     | 3333-n298          | unique         |
| 102                  | Southern California | 1983              | CCGGCGG (2)        | 2212-5483     | 1543-1228          | unique         |
| 105                  | Southern California | 1983              | CCAGCGA (1)        | 1221-4282     | 2422-1228          | unique         |
| 107                  | Southern California | 1983              | CCGGCGG (2)        | 2112-3383     | 3333-1298          | unique         |
| 108                  | Southern California | 1983              | CCGGCGG (2)        | 2112-3383     | 3333-1298          | J              |
| 110                  | Southern California | 1983              | CCGGCGG (2)        | 2212-5483     | 0543-1228          | unique         |

\*isolates in this set were previously described in Horan *et al* 2006 (7)

†hsp65 type (code) = Concatenation of bases present at hsp65 633, 1128, 1218, 1269, 1272, 1488 and 1536 and hsp65 code #s correspond to those presented in Turenne *et al* 2006 (15) except 16 and 17, which correspond to sequences not previously reported (GenBankAccession #1198075 and 1198086)

‡LSP-MVR type = large-sequence polymorphism/MIRU/VNTR analysis; digits of type represent loci HSDR, DA2/LSP2, DA7/LSP7, DEL11/LSPP5, X3, 25, 32, 47 (7); "1" is used to indicate the absence of the large-sequence polymorphism, which corresponds to product lengths of 343bp (for HSDR), 834bp (for DA2/LSP2), 329bp (for DA7/LSP7) and 728bp (for DEL11/LSPP5). "2" is used to indicate the presence of the large-sequence polymorphism, which corresponds to product lengths of 480bp (for HSDR), 954bp (for DA2/LSP2), 181bp (for DA7/LSP7) and 794bp (for DEL11/LSPP5) (7); digits for MIRU/VNTR type represent the number of repeats inferred from the product length at that locus, based on product sizes and repeat numbers from Thibault *et al* (14) and personal correspondence with V. Thibault: 196bp when 2 repeats of 53bp are present [X3], 350bp when 3 repeats of 58bp are present [25], 298bp when 8 repeats of 18bp are present [32] and 217bp when 3 repeats of 35bp are present [47].

§ 8-locus MIRU-VNTR = mycobacterial interspersed repetitive unit – variable-number tandem repeat, using loci: 292, X3, 25, 47, 3, 7, 10, 32; n = no bands observed

\*\*rep-PCR type = repetitive-sequence-based PCR type; results for isolates in this analysis were combined with results for all MAC isolates in the SBRI rep-PCR library using the Diversilab software, and letter type designations were assigned to branches of the dendrogram with at least 92% average similarity

Supplementary Table S2. Clinical strains used in geographical analysis

| Name or number | Place of isolation  | Time of isolation | hsp65 type (code)* | LSP-MVR type† | rep-PCR type‡     | PFGE pattern§ | Citation(s) |
|----------------|---------------------|-------------------|--------------------|---------------|-------------------|---------------|-------------|
| 1061-1-BC-2 o  | Boston, U.S.A.      | 1990s             | not done           | 2112-3282     | not done          | not done      | (16-18)     |
| AR14           | Little Rock, U.S.A. | 1999              | not done           | not done      | unique            | not done      | (7,9)       |
| BR27           | São Paulo, Brazil   | 1998              | not done           | 2111-2483     | not done          | not done      | (7,10)      |
| BR34           | São Paulo, Brazil   | 1998              | not done           | 2212-3383     | unique            | not done      | (7,10)      |
| BR37           | São Paulo, Brazil   | 1998              | not done           | not done      | unique            | not done      | (7,10)      |
| BR51           | São Paulo, Brazil   | 1998              | not done           | 2112-1683     | S                 | not done      | (7,10)      |
| BR54           | São Paulo, Brazil   | 1998              | not done           | 2112-1682     | S                 | not done      | (7,10)      |
| BR62BR         | São Paulo, Brazil   | 1998              | not done           | 2112-1183     | not done          | not done      | (7,10)      |
| BR62TL         | São Paulo, Brazil   | 1998              | not done           | not done      | H                 | not done      | (7,10)      |
| BR65           | São Paulo, Brazil   | 1998              | not done           | not done      | H                 | not done      | (7,10)      |
| BR67           | São Paulo, Brazil   | 1998              | not done           | not done      | unique            | not done      | (7,10)      |
| BR69           | São Paulo, Brazil   | 1998              | not done           | 1121-5282     | unique            | not done      | (7,10)      |
| BR75           | São Paulo, Brazil   | 1998              | not done           | 2112-3383     | unique            | not done      | (7,10)      |
| BR80           | São Paulo, Brazil   | 1998              | CCAGCGA (1)        | 1111-5282     | unique            | not done      | (7,10)      |
| 5026-1-F-3     | Hanover, U.S.A.     | 1990s             | not done           | 2112-5283     | not done          | not done      | (16-18)     |
| 5029-3-SK-1    | Hanover, U.S.A.     | 1990s             | not done           | 1121-4282     | not done          | not done      | (16-18)     |
| 5047-1-F-1 o   | Hanover, U.S.A.     | 1990s             | not done           | 2211-2383     | not done          | not done      | (16-18)     |
| 5060-1-R-3     | Hanover, U.S.A.     | 1990s             | not done           | 2212-3283     | not done          | not done      | (16-18)     |
| CW12           | Southern California | 1994              | not done           | 1211-2483     | not done          | not done      | (1,2,7)     |
| CW22           | Southern California | 1994              | not done           | 1211-4282     | not done          | 4             | (1,2,7)     |
| CW26           | Southern California | 1994              | CCAGCGA (1)        | not done      | C                 | not done      | (1,2,7)     |
| CW4            | Southern California | 1993              | not done           | 2211-2282     | unique            | not done      | (1,2,7)     |
| CW5            | Southern California | 1994              | not done           | 1211-2483     | not interpretable | 2             | (1,2,7)     |
| CW68           | Southern California | 1995              | not done           | 1211-2483     | not done          | 3             | (1,2,7)     |
| W10            | Southern California | 1990              | not done           | 1121-4282     | D                 | not done      | (1,2,7)     |
| W17            | Southern California | 1990              | not done           | not done      | F                 | not done      | (1,2,7)     |
| W112           | Southern California | 1989              | not done           | 2211-2283     | unique            | 1             | (1,2,7)     |
| W120           | Southern California | 1989              | CCAGCGA (1)        | 2221-4282     | unique            | not done      | (1,2,7)     |
| W123           | Southern California | 1989              | not done           | not done      | unique            | not done      | (1,2,7)     |
| W124           | Southern California | 1989              | not done           | 1211-4282     | not done          | 4             | (1,2,7)     |
| W126           | Southern California | 1989              | not done           | 1221-3282     | B                 | 8             | (1,2,7)     |
| W129           | Southern California | 1989              | not done           | 1121-3282     | P                 | 9             | (1,2,7)     |
| W166           | Southern California | 1989              | not done           | 1211-2483     | not done          | 1             | (1,2,7)     |
| W167           | Southern California | 1989              | not done           | 1112-4282     | unique            | not done      | (1,2,7)     |
| W182           | Southern California | 1990              | not done           | 1211-2483     | unique            | 1             | (1,2,7)     |
| W187           | Southern California | 1991              | not done           | 2221-3482     | unique            | not done      | (1,2,7)     |
| W198           | Southern California | 1991              | not done           | 1121-2282     | unique            | not done      | (1,2,7)     |
| W203           | Southern California | 1991              | not done           | 2211-2283     | unique            | 1             | (1,2,7)     |
| W205           | Southern California | 1991              | not done           | not done      | D                 | not done      | (1,2,7)     |
| W214           | Southern California | 1991              | CCAGCGA (1)        | 1221-4282     | B                 | 7             | (1,2,7)     |
| W216-8         | Southern California | 1991              | not done           | 1221-4282     | X                 | 5             | (1,2,7)     |
| W272           | Southern California | 1991              | CCGGCGG (2)        | 2112-5483     | not done          | not done      | (1,2,7)     |
| W349           | Southern California | 1993              | not done           | 1211-2283     | not done          | not done      | (1,2,7)     |
| W350-8         | Southern California | 1993              | not done           | not done      | unique            | not done      | (1,2,7)     |
| W355           | Southern California | 1993              | CCGGCGG (2)        | 2112-3383     | unique            | 13            | (1,2,7)     |
| W357           | Southern California | 1993              | not done           | not done      | N                 | not done      | (1,2,7)     |
| W393           | Southern California | 1993              | not done           | 1211-4282     | not done          | 6             | (1,2,7)     |
| W394           | Southern California | 1993              | not done           | 2112-3383     | not done          | not done      | (1,2,7)     |
| W41            | Southern California | 1990              | CCAGCGA (1)        | 1212-4282     | X                 | not done      | (1,2,7)     |
| W60            | Southern California | 1990              | not done           | not done      | D                 | not done      | (1,2,7)     |
| W61            | Southern California | 1990              | CCAGCGA (1)        | 2211-3383     | unique            | not done      | (1,2,7)     |
| W80            | Southern California | 1990              | not done           | not done      | T                 | not done      | (1,2,7)     |
| W88            | Southern California | 1990              | not done           | not done      | F                 | not done      | (1,2,7)     |
| 395            | Montreal, Canada    | 1999-2003         | not done           | 2112-3383     | unique            | not done      | (7,11)      |
| 976            | Montreal, Canada    | 1999-2003         | not done           | 2112-5383     | unique            | not done      | (7,11)      |
| 2049           | Montreal, Canada    | 1999-2003         | not done           | 2112-5383     | not done          | not done      | (7,11)      |
| 03240          | Montreal, Canada    | 1999-2003         | not done           | 2112-3383     | not interpretable | 12            | (7,11)      |

|                      |                  |           |             |           |                   |          |        |
|----------------------|------------------|-----------|-------------|-----------|-------------------|----------|--------|
| 4840                 | Montreal, Canada | 1999-2003 | not done    | 2112-5383 | O                 | not done | (7,11) |
| 4904                 | Montreal, Canada | 1999-2003 | CCGGCGG (2) | 2112-3383 | W                 | 10       | (7,11) |
| 8422                 | Montreal, Canada | 1999-2003 | CCGGCGG (2) | 2112-5383 | N                 | not done | (7,11) |
| 13373                | Montreal, Canada | 1999-2003 | GGGGGCG(17) | 211n-1n8n | not done          | not done | (7,11) |
| 28132                | Montreal, Canada | 1999-2003 | CGGCGGG (3) | 1111-5282 | I                 | 12       | (7,11) |
| 53198                | Montreal, Canada | 1999-2003 | not done    | 2112-5383 | N                 | not done | (7,11) |
| 57413                | Montreal, Canada | 1999-2003 | not done    | not done  | N                 | not done | (7,11) |
| 62490                | Montreal, Canada | 1999-2003 | not done    | 2112-5383 | unique            | not done | (7,11) |
| 63787                | Montreal, Canada | 1999-2003 | not done    | 2112-5383 | V                 | not done | (7,11) |
| 74301                | Montreal, Canada | 1999-2003 | not done    | 2112-5383 | not done          | not done | (7,11) |
| 76102                | Montreal, Canada | 1999-2003 | not done    | 2112-5383 | O                 | not done | (7,11) |
| 82307                | Montreal, Canada | 1999-2003 | not done    | 2112-5383 | N                 | not done | (7,11) |
| 98838                | Montreal, Canada | 199-2003  | not done    | not done  | V                 | not done | (7,11) |
| NET1 (NLA009601988)  | Netherlands      | 1996      | not done    | 2211-2283 | not done          | not done | (7,8)  |
| NET10 (NLA009600097) | Netherlands      | 1995      | not done    | 1111-4282 | I                 | not done | (7,8)  |
| NET12 (NLA009601343) | Netherlands      | 1996      | not done    | 1211-2483 | not done          | not done | (7,8)  |
| NET13 (NLA009601477) | Netherlands      | 1996      | not done    | 1211-4282 | F                 | not done | (7,8)  |
| NET14 (NLA009600753) | Netherlands      | 1996      | not done    | 1111-2282 | E                 | not done | (7,8)  |
| NET15 (NLA009600902) | Netherlands      | 1996      | not done    | 1111-2282 | E                 | not done | (7,8)  |
| NET16 (NLA009600217) | Netherlands      | 1995      | not done    | 2211-2283 | not done          | not done | (7,8)  |
| NET17 (NLA009600751) | Netherlands      | 1996      | CCAGCGA (1) | 1121-3282 | C                 | not done | (7,8)  |
| NET19 (NLA009601234) | Netherlands      | 1996      | CCAGCGA (1) | 1121-2282 | T                 | not done | (7,8)  |
| NET2 (NLA009600730)  | Netherlands      | 1996      | not done    | 2111-2283 | unique            | not done | (7,8)  |
| NET20 (NLA009601375) | Netherlands      | 1996      | CGGCGGG (3) | 1111-4282 | unique            | not done | (7,8)  |
| NET21 (NLA009601442) | Netherlands      | 1996      | not done    | 1111-2282 | E                 | not done | (7,8)  |
| NET22 (NLA009601499) | Netherlands      | 1996      | CCAGCGA (1) | 1221-3282 | C                 | not done | (7,8)  |
| NET23 (NLA009601554) | Netherlands      | 1996      | CCGGCGG (2) | 2112-3383 | W                 | not done | (7,8)  |
| NET24 (NLA009601696) | Netherlands      | 1996      | not done    | not done  | I                 | not done | (7,8)  |
| NET26 (NLA009600192) | Netherlands      | 1996      | not done    | 1111-4282 | E                 | not done | (7,8)  |
| NET27 (NLA009600433) | Netherlands      | 1996      | not done    | 1111-4282 | I                 | not done | (7,8)  |
| NET28 (NLA009601594) | Netherlands      | 1996      | not done    | 2112-3383 | not interpretable | not done | (7,8)  |
| NET29 (NLA009600281) | Netherlands      | 1995      | not done    | 1111-4282 | E                 | not done | (7,8)  |
| NET30 (NLA009600514) | Netherlands      | 1996      | not done    | 1111-4282 | I                 | not done | (7,8)  |
| NET31 (NLA009600877) | Netherlands      | 1996      | not done    | 1111-4282 | E                 | not done | (7,8)  |
| NET32 (NLA009601344) | Netherlands      | 1996      | not done    | 1211-4282 | not done          | not done | (7,8)  |
| NET33 (NLA009601739) | Netherlands      | 1996      | not done    | 2211-2283 | not done          | not done | (7,8)  |
| NET38 (NLA009601391) | Netherlands      | 1996      | CCAGCGA (1) | 1111-2282 | E                 | not done | (7,8)  |
| NET39 (NLA009601393) | Netherlands      | 1996      | CCAGCGA (1) | 1111-2282 | E                 | not done | (7,8)  |
| NET4 (NLA009600239)  | Netherlands      | 1996      | not done    | 1111-2282 | F                 | not done | (7,8)  |
| NET40 (NLA009601542) | Netherlands      | 1996      | not done    | 1111-2282 | E                 | not done | (7,8)  |
| NET41 (NLA009601734) | Netherlands      | 1996      | not done    | 1111-2282 | E                 | not done | (7,8)  |
| NET42 (NLA009601158) | Netherlands      | 1996      | CGGCGGG (3) | 1111-4282 | I                 | not done | (7,8)  |
| NET43 (NLA009601794) | Netherlands      | 1996      | not done    | 1111-4282 | I                 | not done | (7,8)  |
| NET46 (NLA009600403) | Netherlands      | 1996      | not done    | 1111-2282 | E                 | not done | (7,8)  |
| NET47 (NLA009600841) | Netherlands      | 1996      | CGGCGGG (3) | 1111-5282 | I                 | not done | (7,8)  |
| NET48 (NLA009600842) | Netherlands      | 1996      | not done    | 1111-4282 | I                 | not done | (7,8)  |
| NET49 (NLA009601198) | Netherlands      | 1996      | not done    | not done  | E                 | not done | (7,8)  |
| NET52 (NLA009601544) | Netherlands      | 1995      | not done    | 1211-2483 | not done          | not done | (7,8)  |
| NET53 (NLA009601738) | Netherlands      | 1996      | not done    | 1112-2282 | F                 | not done | (7,8)  |
| NET54 (NLA009601816) | Netherlands      | 1995      | not done    | not done  | I                 | not done | (7,8)  |
| NET55 (NLA009601888) | Netherlands      | 1996      | not done    | 1111-2282 | E                 | not done | (7,8)  |
| NET56 (NLA009601899) | Netherlands      | 1996      | CCAGCGA (1) | 1121-3282 | C                 | not done | (7,8)  |
| NET57 (NLA009601549) | Netherlands      | 1996      | not done    | 1111-2282 | F                 | not done | (7,8)  |
| NET58 (NLA009600206) | Netherlands      | 1995      | not done    | 1111-4282 | I                 | not done | (7,8)  |
| NET59 (NLA009600436) | Netherlands      | 1996      | not done    | 1111-4282 | I                 | not done | (7,8)  |
| NET6 (NLA009600846)  | Netherlands      | 1996      | not done    | 1111-7282 | not done          | not done | (7,8)  |
| NET61 (NLA009601392) | Netherlands      | 1996      | CCAGCGA (1) | 1111-2282 | F                 | not done | (7,8)  |
| NET62 (NLA009601543) | Netherlands      | 1996      | not done    | 1111-2282 | F                 | not done | (7,8)  |
| NET63 (NLA009600536) | Netherlands      | 1996      | CGGCGGG (3) | 1111-4282 | F                 | not done | (7,8)  |
| NET67 (NLA009600205) | Netherlands      | 1995      | CGGCGGG (3) | 1111-4282 | I                 | not done | (7,8)  |

|                      |                     |           |             |           |                   |                   |           |
|----------------------|---------------------|-----------|-------------|-----------|-------------------|-------------------|-----------|
| NET68 (NLA009602012) | Netherlands         | 1995      | not done    | 1111-5282 | I                 | not done          | (7,8)     |
| NET70 (NLA009600511) | Netherlands         | 1996      | not done    | 1111-3282 | F                 | not done          | (7,8)     |
| NET71 (NLA009600531) | Netherlands         | 1996      | CCAGCGA (1) | 1111-2282 | F                 | not done          | (7,8)     |
| NET75 (NLA009600098) | Netherlands         | 1995      | not done    | 1111-4282 | I                 | not done          | (7,8)     |
| NET76 (NLA009601555) | Netherlands         | 1996      | CCAGCGA (1) | 1111-2282 | F                 | not done          | (7,8)     |
| NET8 (NLA009601245)  | Netherlands         | 1994      | not done    | 1111-4282 | I                 | not done          | (7,8)     |
| NET80 (NLA009600224) | Netherlands         | 1995      | not done    | 2112-5382 | not done          | not done          | (7,8)     |
| HMC02                | Seattle, U.S.A.     | 1999-2001 | CCAGCGA (1) | 2112-3383 | J                 | not interpretable | (2,3,7,9) |
| HMC05                | Seattle, U.S.A.     | 1999-2001 | CCAGCGA (1) | 1221-2282 | B                 | not done          | (2,3,7,9) |
| HMC07                | Seattle, U.S.A.     | 1999-2001 | not done    | not done  | B                 | not done          | (2,3,7,9) |
| HMC08                | Seattle, U.S.A.     | 1999-2001 | not done    | 1221-4282 | B                 | 7                 | (2,3,7,9) |
| HMC10                | Seattle, U.S.A.     | 1999-2001 | CCAGCGA (1) | 1221-2282 | unique            | not done          | (2,3,7,9) |
| HMC19                | Seattle, U.S.A.     | 1999-2001 | CCAGCGA (1) | 1121-3282 | P                 | not done          | (2,3,7,9) |
| HMC20                | Seattle, U.S.A.     | 1999-2001 | CCGGCGG (2) | 2212-3383 | unique            | not done          | (2,3,7,9) |
| HMC22                | Seattle, U.S.A.     | 1999-2001 | not done    | 2211-3283 | not done          | not done          | (2,3,7,9) |
| HMC24                | Seattle, U.S.A.     | 1999-2001 | CCAGCGA (1) | 1221-4282 | B                 | 4                 | (2,3,7,9) |
| HMC31                | Seattle, U.S.A.     | 1999-2001 | not done    | 2112-1483 | not done          | not done          | (2,3,7,9) |
| HMC33                | Seattle, U.S.A.     | 1999-2001 | not done    | 2112-3383 | not interpretable | not done          | (2,3,7,9) |
| HMC34                | Seattle, U.S.A.     | 1999-2001 | not done    | not done  | unique            | not done          | (2,3,7,9) |
| HMC36                | Seattle, U.S.A.     | 1999-2001 | not done    | 2112-2483 | A                 | not done          | (2,3,7,9) |
| HMC45                | Seattle, U.S.A.     | 1999-2001 | not done    | 2112-3383 | not interpretable | not done          | (2,3,7,9) |
| HMC46                | Seattle, U.S.A.     | 1999-2001 | not done    | 2112-1483 | not done          | not done          | (2,3,7,9) |
| 101                  | Southern California | 1983      | CCAGCGA (1) | 1221-5292 | B                 | not done          | (2,7)     |
| 102                  | Southern California | 1983      | CCGGCGG (2) | 2212-5483 | unique            | not done          | (2,7)     |
| 103                  | Southern California | 1983      | not done    | not done  | B                 | not done          | (2,7)     |
| 104                  | Southern California | 1983      | CCAGCGA (1) | 1221-5292 | B                 | not done          | (2,7)     |
| 105                  | Southern California | 1983      | CCAGCGA (1) | 1221-4282 | unique            | 8                 | (2,7)     |
| 107                  | Southern California | 1983      | CCGGCGG (2) | 2112-3383 | unique            | not done          | (2,7)     |
| 108                  | Southern California | 1983      | CCGGCGG (2) | 2112-3383 | J                 | 10                | (2,7)     |
| 109                  | Southern California | 1983      | not done    | not done  | unique            | not done          | (2,7)     |
| 110                  | Southern California | 1983      | CCGGCGG (2) | 2212-5483 | unique            | not done          | (2,7)     |
| 111                  | Southern California | 1983      | not done    | not done  | unique            | not done          | (2,7)     |
| 113                  | Southern California | 1983      | not done    | 2212-5283 | not done          | not done          | (2,7)     |
| 501                  | Southern California | 1985      | not done    | not done  | unique            | not done          | (2,7)     |
| 502                  | Southern California | 1985      | CCAGCGA (1) | 1221-3282 | B                 | not done          | (2,7)     |
| 503                  | Southern California | 1985      | CCAGCGA (1) | 1221-5292 | B                 | not done          | (2,7)     |
| 504                  | Southern California | 1985      | not done    | not done  | unique            | not done          | (2,7)     |
| 505                  | Southern California | 1985      | not done    | not done  | unique            | not done          | (2,7)     |

\*hsp65 type (code) = Concatenation of bases present at hsp65 633, 1128, 1218, 1269, 1272, 1488 and 1536 and hsp65 code #s correspond to those presented in Turenne *et al* 2006 (15).

†LSP-MVR type = large-sequence polymorphism/MIRU/VNTR analysis; digits of type represent loci HSDR, DA2/LSP2, DA7/LSP7, DEL11/LSP5, X3, 25, 32, 47 (7,14); "1" is used to indicate the absence of the large-sequence polymorphism, which corresponds to product lengths of 343bp (for HSDR), 834bp (for DA2/LSP2), 329bp (for DA7/LSP7) and 728bp (for DEL11/LSP5). "2" is used to indicate the presence of the large-sequence polymorphism, which corresponds to product lengths of 480bp (for HSDR), 954bp (for DA2/LSP2), 181bp (for DA7/LSP7) and 794bp (for DEL11/LSP5) (7); digits for MIRU/VNTR type represent the number of repeats inferred from the product length at that locus, based on product sizes and repeat numbers from Thibault *et al* (14) and personal correspondence with V. Thibault: 196bp when 2 repeats of 53bp are present [X3], 350bp when 3 repeats of 58bp are present [25], 298bp when 8 repeats of 18bp are present [32] and 217bp when 3 repeats of 35bp are present [47]

‡rep-PCR type = repetitive-sequence-based PCR type; results for isolates in this analysis were combined with results for all MAC isolates in the SBRI rep-PCR library using the Diversilab software, and letter type designations were assigned to branches of the dendrogram with at least 92% average similarity

§PFGE pattern = pulsed-field electrophoresis results that are indistinguishable by the criteria of Tenover *et al* 1995 (13).

Supplementary Table S3. Environmental strains used in LSP-MVR analysis\*

| Name or number | Place of isolation   | Time of isolation | LSP-MVR type | Citation(s) |
|----------------|----------------------|-------------------|--------------|-------------|
| E1508-3        | Boston, U.S.A.       | 1990s             | 2112-5383    | (18)        |
| E5502-1        | Hanover, U.S.A.      | 1990s             | 2122-3383    | (18)        |
| Crud-3         | Denver, U.S.A.       | 2000s             | 1122-3383    | (5)         |
| Hot-2          | Denver, U.S.A.       | 2000s             | 2122-3382    | (5)         |
| CA2            | Southern California  | 1997              | 1121-2282    | (6,19)      |
| CA3            | Southern California  | 1997              | 2112-3383    | (6,19)      |
| CA4            | Southern California  | 1997              | 2112-3383    | (6,19)      |
| CA5            | Southern California  | 1997              | 2112-3383    | (6,19)      |
| CA7            | Southern California  | 1997              | 2112-3383    | (6,19)      |
| D10CC5tlsp     | Southern California  | 1991              | 2112-3383    | (6,19)      |
| D10CN4W        | Southern California  | 1991              | 2112-3383    | (6,19)      |
| D20BN1N        | Southern California  | 1992              | 2112-3383    | (6,19)      |
| D20DN8N        | Southern California  | 1992              | 2112-3383    | (6,19)      |
| D41BC8N        | Southern California  | 1992              | 2112-3383    | (6,19)      |
| D41CO1         | Southern California  | 1992              | 2112-3383    | (6,19)      |
| D41EC8N        | Southern California  | 1992              | 2112-3383    | (6,19)      |
| D41EO8N        | Southern California  | 1992              | 2112-3383    | (6,19)      |
| D55AC8N        | Southern California  | 1992              | 2112-3383    | (6,19)      |
| D55AO1         | Southern California  | 1992              | 2112-3383    | (6,19)      |
| F100           | Southern California  | 1997              | 1211-4282    | (6,19)      |
| F103B          | Southern California  | 1997              | 1121-4282    | (6,19)      |
| F72B           | Southern California  | 1997              | 1121-4282    | (6,19)      |
| F72C           | Southern California  | 1997              | 1121-4282    | (6,19)      |
| F7A            | Southern California  | 1997              | 1121-4282    | (6,19)      |
| F86            | Southern California  | 1997              | 1121-4282    | (6,19)      |
| H10BO1         | Southern California  | 1992              | 2112-3383    | (6,19)      |
| H14FC8N        | Southern California  | 1993              | 2212-3383    | (6,19)      |
| HO4AC5         | Southern California  | 1991              | 2112-3383    | (6,19)      |
| HO5DN5         | Southern California  | 1991              | 2112-3383    | (6,19)      |
| HO8FC8N        | Southern California  | 1992              | 2212-3383    | (6,19)      |
| W292           | Southern California  | 1992              | 2112-3383    | (6,19)      |
| P50073         | U.S. West Coast City | 2001              | 2112-3483    | (6)         |
| P50075         | U.S. West Coast City | 2001              | 2112-3383    | (6)         |
| P50079         | U.S. West Coast City | 2001              | 2112-3383    | (6)         |
| P50091         | U.S. West Coast City | 2001              | 2212-3383    | (6)         |
| P50099         | U.S. West Coast City | 2001              | 2112-3383    | (6)         |
| P50103         | U.S. West Coast City | 2001              | 2112-3383    | (6)         |
| P50112         | U.S. West Coast City | 2001              | 2212-3383    | (6)         |
| P50135         | U.S. West Coast City | 2001              | 2112-3383    | (6)         |
| P50139         | U.S. West Coast City | 2001              | 2112-3383    | (6)         |
| P50171         | U.S. West Coast City | 2002              | 2212-3383    | (6)         |
| P50181         | U.S. West Coast City | 2002              | 2112-3383    | (6)         |
| P50183         | U.S. West Coast City | 2002              | 2112-3383    | (6)         |
| P50187         | U.S. West Coast City | 2002              | 2212-3383    | (6)         |
| P50195         | U.S. West Coast City | 2002              | 2112-3383    | (6)         |
| P50199         | U.S. West Coast City | 2002              | 2112-3383    | (6)         |
| P50207         | U.S. West Coast City | 2002              | 2212-3383    | (6)         |
| P50211         | U.S. West Coast City | 2002              | 2112-3383    | (6)         |
| A001-2-1-2     | U.S. Potting Soil    | 2000s             | 1121-4282    | (4)         |
| A001-2-5-1     | U.S. Potting Soil    | 2000s             | 1121-4282    | (4)         |
| A002-1-1-1     | U.S. Potting Soil    | 2000s             | 1121-4282    | (4)         |
| A019-C-4-1     | U.S. Potting Soil    | 2000s             | 2112-3273    | (4)         |
| W978           | Westchester, U.S.A.  | 1980s             | 1112-5282    | (12)        |

\* LSP-MVR type = large-sequence polymorphism/MIRU/VNTR analysis; digits of type represent loci HSDR, DA2/LSP2, DA7/LSP7, DEL11/LSP5, X3, 25, 32, 47 (7,14); "1" is used to indicate the absence of the large-sequence polymorphism, which corresponds to product lengths of 343bp (for HSDR), 834bp (for DA2/LSP2), 329bp (for DA7/LSP7) and 728bp (for DEL11/LSP5). "2" is used to indicate the presence of the large-sequence polymorphism, which corresponds to product lengths of 480bp (for HSDR), 954bp (for DA2/LSP2), 181bp (for DA7/LSP7) and 794bp (for DEL11/LSP5) (7); digits for MIRU/VNTR type represent the number of repeats inferred from the product length at that locus, based on product sizes and repeat numbers from Thibault et al (14) and personal correspondence with V. Thibault: 196bp when 2 repeats of 53bp are present [X3], 350bp when 3 repeats of 58bp are present [25], 298bp when 8 repeats of 18bp are present [32] and 217bp when 3 repeats of 35bp are present [47].

**Supplemental Information S4. Mycobacterial genomic DNA preparation protocol modified from ArchivePure DNA Cell/Tissue Kit from 5'**

1. Pre-heat hybridization oven or waterbath to 55°C.
2. Transfer mobio garnet beads to 2 mL screw-top tube.
3. Add 800 µL lysis solution to each tube.
4. Add appx 10 µL loop of cells (or 1-5 OD) to each tube.
5. Bead-beat on vortex adapter for 30 min @ high power.
6. Spin at max for 1 min.
7. Transfer lysate supernatant to a new 2 mL screw-top tube.
8. Add 15 µL of Proteinase K (20 mg/ml), mix by inverting 25 times.
9. Incubate lysate at 55°C 30 min or overnight.
10. Let cool 10min, then add 3 µL Rnase A Solution (20 mg/mL) to the cell lysate. Incubate at 37°C for 30-60 min.
11. Cool sample to room temperature (~10 min), then add 0.3 mL Protein Precipitation Solution to the lysate.
12. Vortex vigorously at high speed for ~20 seconds to mix, then cool on wet ice for 5-30 minutes.
13. Spin at max for 5 minutes to pellet protein precipitate.
14. Pipette supe (go for purity over yield) to a clean 2mL (snap-top) tube
15. Precipitate (ppt) DNA by adding 800 µL isopropanol.
16. Gently invert 50 times, and let sit at room temp 5-30 min to ppt DNA; a white stringy ppt may emerge (DNA).
17. Spin at max for 5 min to pellet precipitated DNA.
18. Wash w/ 1ml 70% ethanol, vortex, then spin at max speed for 1 min. You should still see a pellet.
19. Suction or gently dump off ethanol. Pellet may be loose, take care not to lose it.
20. Dry by leaving upside down 1 hour, or by low-mid temperature speedvac for 20 minutes.
21. Make sure all ethanol has evaporated.
22. Resuspend in 100 µl TE. Vortexing/heat/more TE may be necessary if yield is high.
23. Analyze by spectrophotometry to determine purity and yield of gDNA.

**Supplementary Table S5. LSP-MVR\* distribution among clinical isolates at seven geographical locations, including GDCs\*, local clinical clusters and strains unique among clinical isolates**

| Group†  | LSP-MVR Genotype | Sao Paulo, Brazil | Southern California | Seattle, U.S.A. | Montreal, Canada | Hanover, U.S.A. | Boston, U.S.A. | Netherlands | Total |
|---------|------------------|-------------------|---------------------|-----------------|------------------|-----------------|----------------|-------------|-------|
| GDC1    | 2112-3383        | 1                 | 4                   | 3               | 3                |                 |                | 2           | 13    |
| GDC2    | 1111-5282        | 1                 |                     |                 | 1                |                 |                | 2           | 4     |
| GDC3    | 1121-3282        |                   | 1                   | 1               |                  |                 |                | 2           | 4     |
| GDC4    | 1211-2483        |                   | 5                   |                 |                  |                 |                | 2           | 7     |
| GDC5    | 1211-4282        |                   | 3                   |                 |                  |                 |                | 2           | 5     |
| GDC6    | 1221-3282        |                   | 2                   |                 |                  |                 |                | 1           | 3     |
| GDC7    | 1221-4282        |                   | 3                   | 2               |                  |                 |                |             | 5     |
| GDC8    | 2211-2283        |                   | 2                   |                 |                  |                 |                | 3           | 5     |
| GDC9    | 2212-3383        | 1                 |                     | 1               |                  |                 |                |             | 2     |
| GDC10   | 1121-2282        |                   | 1                   |                 |                  |                 |                | 1           | 2     |
| GDC11   | 1121-4282        |                   | 1                   |                 |                  | 1               |                |             | 2     |
| GDC12   | 2112-5383        |                   |                     |                 | 10               | 1               |                |             | 11    |
| Local 1 | 1111-2282        |                   |                     |                 |                  |                 |                | 15          | 15    |
| Local 2 | 1111-4282        |                   |                     |                 |                  |                 |                | 16          | 16    |
| Local 3 | 1221-2282        |                   |                     | 2               |                  |                 |                |             | 2     |
| Local 4 | 1221-5292        |                   | 3                   |                 |                  |                 |                |             | 3     |
| Local 5 | 2112-1483        |                   |                     | 2               |                  |                 |                |             | 2     |
| Local 6 | 2212-5483        |                   | 2                   |                 |                  |                 |                |             | 2     |
| Unique  | 1111-3282        |                   |                     |                 |                  |                 |                | 1           | 1     |
|         | 1111-7282        |                   |                     |                 |                  |                 |                | 1           | 1     |
|         | 1112-2282        |                   |                     |                 |                  |                 |                | 1           | 1     |
|         | 1112-4282        |                   | 1                   |                 |                  |                 |                |             | 1     |
|         | 1121-5282        | 1                 |                     |                 |                  |                 |                |             | 1     |
|         | 1211-2283        |                   | 1                   |                 |                  |                 |                |             | 1     |
|         | 1212-4282        |                   | 1                   |                 |                  |                 |                |             | 1     |
|         | 2111-2283        |                   |                     |                 |                  |                 |                | 1           | 1     |
|         | 2111-2483        | 1                 |                     |                 |                  |                 |                |             | 1     |
|         | 2112-1183        | 1                 |                     |                 |                  |                 |                |             | 1     |
|         | 2112-1682        | 1                 |                     |                 |                  |                 |                |             | 1     |
|         | 2112-1683        | 1                 |                     |                 |                  |                 |                |             | 1     |
|         | 2112-2483        |                   |                     | 1               |                  |                 |                |             | 1     |
|         | 2112-3282        |                   |                     |                 |                  |                 | 1              |             | 1     |
|         | 2112-5382        |                   |                     |                 |                  |                 |                | 1           | 1     |
|         | 2112-5483        |                   | 1                   |                 |                  |                 |                |             | 1     |
|         | 2211-2282        |                   | 1                   |                 |                  |                 |                |             | 1     |
|         | 2211-2383        |                   |                     |                 |                  | 1               |                |             | 1     |
|         | 2211-3283        |                   |                     | 1               |                  |                 |                |             | 1     |
|         | 2211-3383        |                   | 1                   |                 |                  |                 |                |             | 1     |
|         | 2212-3283        |                   |                     |                 |                  | 1               |                |             | 1     |

|                          |           |          |           |           |           |          |          |           |            |
|--------------------------|-----------|----------|-----------|-----------|-----------|----------|----------|-----------|------------|
|                          | 2212-5283 |          | 1         |           |           |          |          | 1         |            |
|                          | 2221-3482 |          | 1         |           |           |          |          | 1         |            |
|                          | 2221-4282 |          | 1         |           |           |          |          | 1         |            |
| <b>Total typed</b>       | -         | <b>8</b> | <b>36</b> | <b>13</b> | <b>14</b> | <b>4</b> | <b>1</b> | <b>51</b> | <b>127</b> |
| <b>In GDCs</b>           | -         | 3 (38%)  | 22 (61%)  | 7 (54%)   | 14 (100%) | 2 (50%)  | 0        | 15 (29%)  | 63 (50%)   |
| <b>In Local Clusters</b> | -         | 0        | 5 (14%)   | 4 (31%)   | 0         | 0        | 0        | 31 (61%)  | 40 (31%)   |
| <b>Unique</b>            | -         | 5 (62%)  | 9 (25%)   | 2 (15%)   | 0         | 2 (50%)  | 1        | 5 (10%)   | 24 (19%)   |

\*LSP-MVR = large-sequence polymorphism/MIRU-VNTR analysis; GDCs = geographically dispersed clinical types

† GDCs were defined by the same LSP-MVR type being found for at least one clinical isolate at each of two or more geographical locations. Local clinical clusters were defined by finding the same LSP-MVR type for two or more clinical isolates at a single geographic location, but not being found among clinical isolates from other geographic locations. Unique types were found for a single isolate in the entire set of clinical genotypes. The presence or absence of the LSP-MVR type among environmental isolates (at the same or a different location) did not affect designation as GDC, local clinical cluster, or unique among clinical isolates.

GDCs were defined by the same LSP-MVR type being found for at least one clinical isolate at each of two or more geographical locations. Local clinical clusters were defined by finding the same LSP-MVR type for two or more clinical isolates at a single geographic location, but not being found among clinical isolates from other geographic locations. Unique types were found for a single isolate in the entire set of clinical genotypes. The presence or absence of the LSP-MVR type among environmental isolates (at the same or a different location) did not affect designation as GDC, local clinical cluster, or unique among clinical isolates.



**Supplementary Table S6. 8-locus MIRU-VNTR types of some isolates sharing GDC\* genotypes**

| Name | LSP-MVR type † | Isolate ID † | Site                | 8-locus MIRU-VNTR type † |
|------|----------------|--------------|---------------------|--------------------------|
| GDC1 | 2112-3383      | 4904         | Montreal            | 3333-12p8                |
|      |                | HMC02        | Seattle             | 3333-12(≥9)8             |
|      |                | 107          | Southern California | 3333-1298                |
|      |                | 108          | Southern California | 3333-1298                |
|      |                | W355         | Southern California | n333-12p8                |
| GDC2 | 1111-5282      | 28132        | Montreal            | 2522-1218                |
|      |                | BR80         | Sao Paolo           | 2522-1228                |
| GDC3 | 1121-3282      | HMC19        | Seattle             | 2322-1228                |
|      |                | NET17        | The Netherlands     | 2322-1228                |
|      |                | NET56        | The Netherlands     | 2322-1228                |
|      |                | W129         | Southern California | 2322-1218                |
| GDC7 | 1221-4282      | W214         | Southern California | 2422-1228                |
|      |                | HMC08        | Seattle             | 2422-1218                |
|      |                | HMC24        | Seattle             | 2422-1218                |
|      |                | W216-8       | Southern California | 2422-1218                |
|      |                | 105          | Southern California | 2422-1228                |

\* GDCs = geographically dispersed clinical strains, GDCs were defined by the same LSP-MVR type being found for at least one clinical isolate at each of two or more geographical locations

† LSP-MVR = large-sequence polymorphism – MIRU/VNTR analysis; MIRU-VNTR = mycobacterial interspersed repetitive unit – variable-number tandem repeat; LSP-MVR and 8-locus MIRU-VNTR types are given for all members of LSP-MVR-defined GDCs for which genomic DNA was randomly selected for method evaluation or archived cultures from more than one location were available for PFGE analysis; identity by 8-locus MIR of isolates from distant geographic locations could only be tested for .

**Supplementary Table S7. LSP-MVR\* distribution among environmental isolates from at least six sites.**

| Group†      | LSP-MVR†  | Southern California | U.S. West Coast Metropolitan Area | U.S. Potting Soil‡ | Denver, U.S.A. | Westchester, U.S.A. | Hanover, U.S.A. | Boston, U.S.A. | Total    |
|-------------|-----------|---------------------|-----------------------------------|--------------------|----------------|---------------------|-----------------|----------------|----------|
| GDC1        | 2112-3383 | 18                  | 15                                |                    |                |                     |                 |                | 33       |
| GDC5        | 1211-4282 | 1                   |                                   |                    |                |                     |                 |                | 1        |
| GDC9        | 2212-3383 | 2                   |                                   |                    |                |                     |                 |                | 2        |
| GDC10       | 1121-2282 | 1                   |                                   |                    |                |                     |                 |                | 1        |
| GDC11       | 1121-4282 | 5                   |                                   | 3                  |                |                     |                 |                | 8        |
| GDC12       | 2112-5383 |                     |                                   |                    |                |                     |                 | 1              | 1        |
| Unique      | 1112-5282 |                     |                                   |                    |                | 1                   |                 |                | 1        |
|             | 1122-3382 |                     |                                   |                    | 1              |                     |                 |                | 1        |
|             | 2112-3273 |                     |                                   | 1                  |                |                     |                 |                | 1        |
|             | 2112-3483 |                     | 1                                 |                    |                |                     |                 |                | 1        |
|             | 2122-3382 |                     |                                   |                    | 1              |                     |                 |                | 1        |
|             | 2122-3383 |                     |                                   |                    |                |                     | 1               |                | 1        |
| Total typed | -         | 27                  | 16                                | 4                  | 2              | 1                   | 1               | 1              | 52       |
| In GDCs     | -         | 27 (100%)           | 15 (94%)                          | 3 (75%)            | 0              | 0                   | 0               | 1 (100%)       | 46 (88%) |

\*LSP-MVR = large-sequence polymorphism – MIRU/VNTR analysis

† HSDR, DA2/LSP2, DA7/LSP7, DEL11/LSP5, X3, 25, 32, 47 (7,14); “1” is used to indicate the absence of the large-sequence polymorphism, which corresponds to product lengths of 343bp (for HSDR), 834bp (for DA2/LSP2), 329bp (for DA7/LSP7) and 728bp (for DEL11/LSP5); “2” is used to indicate the presence of the large-sequence polymorphism, which corresponds to product lengths of 480bp (for HSDR), 954bp (for DA2/LSP2), 181bp (for DA7/LSP7) and 794bp (for DEL11/LSP5) (7); digits for MVR type represent the number of repeats inferred from the product length at that locus, based on product sizes and repeat numbers from Thibault *et al* 2007 (14) and personal correspondence with V. Thibault: 196bp when 2 repeats of 53bp are present [X3], 350bp when 3 repeats of 58bp are present [25], 298bp when 8 repeats of 18bp are present [32] and 217bp when 3 repeats of 35bp are present [47].

‡ For the U.S. Potting Soil collection, individuals with nontuberculous mycobacterial lung disease seen at a reference center were asked to send samples of potting soil from their homes for analysis; these individuals lived throughout the U.S.

### Supplementary information reference list

1. **Aronson, T., A. Holtzman, N. Glover, M. Boian, S. Froman, O. G. W. Berlin, H. Hill, and G. Stelma.** 1999. Comparison of large restriction fragments of *Mycobacterium avium* isolates recovered from AIDS and non-AIDS patients with those of isolates from potable water. *J Clin Microbiol* **37**:1008-1012.
2. **Cangelosi GA, Freeman R, Lewis KN, Livingston-Rosanoff D, Milan SJ, and Goldberg S.** 2004. Evaluation of a high throughput rep-PCR system for DNA fingerprinting of *Mycobacterium tuberculosis* and *Mycobacterium avium* complex. *J Clin Microbiol* **42**:2685-2693.
3. **Cangelosi, G. A., C. O. Palermo, J. P. Laurent, A. M. Hamlin, and W. H. Brabant.** 1999. Colony morphotypes on Congo red agar segregate along species and drug susceptibility lines in the *Mycobacterium avium*--*intracellulare* complex. *Microbiology* **145**:1317-1324.
4. **De Groote, M. A., N. R. Pace, K. Fulton, and J. O. Falkinham, III.** 2006. Relationships between *Mycobacterium* Isolates from Patients with Pulmonary *Mycobacterial* Infection and Potting Soils. *Appl.Environ.Microbiol.* **72**:7602-7606.
5. **Falkinham, J. O., M. D. Iseman, P. de Haas, and D. van Soolingen.** 2008. *Mycobacterium avium* in a shower linked to pulmonary disease. *Journal of Water & Health* **6**:209-213. doi:Article.
6. **Hilborn, E. D., T. C. Covert, M. A. Yakus, S. I. Harris, S. F. Donnelly, E. W. Rice, S. Toney, S. A. Bailey, and G. N. Stelma, Jr.** 2006. Persistence of Nontuberculous *Mycobacteria* in a Drinking Water System after Addition of Filtration Treatment. *Appl.Environ.Microbiol.* **72**:5864-5869.
7. **Horan, K. L., R. Freeman, K. Weigel, M. Semret, S. Pfaller, T. C. Covert, D. van Soolingen, S. C. Leao, M. A. Behr, and G. A. Cangelosi.** 2006. Isolation of the Genome Sequence Strain *Mycobacterium avium* 104 from Multiple Patients over a 17-Year Period. *J.Clin.Microbiol.* **44**:783-789.
8. **Komijn, R. E., P. E. áW. de Haas, M. M. Schneider, T. Eger, J. H. Nieuwenhuijs, R. J. van den Hoek, D. Bakker, F. G. Zijd Erveld, and D. van Soolingen.** 1999. Prevalence of *Mycobacterium avium* in Slaughter Pigs in The Netherlands and Comparison of IS1245 Restriction Fragment Length Polymorphism Patterns of Porcine and Human Isolates. *J.Clin.Microbiol.* **37**:1254-1259.
9. **Mukherjee S, Petrofsky M, Yaraei K, Bermudez LE, and Cangelosi GA.** 2001. The white morphotype of *Mycobacterium avium-intracellulare* is common in infected humans and virulent in infection models. *J Infect Dis* **184**:1480-1484.
10. **Oliveira, R. S., M. P. Sircili, E. M. D. Oliveira, S. C. Balian, J. S. Ferreira-Neto, and S. C. Le+úo.** 2003. Identification of *Mycobacterium avium* Genotypes with Distinctive Traits by Combination of IS1245-Based Restriction Fragment Length Polymorphism and Restriction Analysis of hsp65. *J.Clin.Microbiol.* **41**:44-49.
11. **Semret M, Zhai G, Mostowy S, Alexander D, Cangelosi GA, Cousins D, van Soolingen D, and Behr M.** 2004. Extensive Genomic Polymorphism within *Mycobacterium avium*. *J.Bacteriol.* **186**:6332-6334.
12. **Stormer RS and Falkinham JO 3rd.** 1989. Differences in antimicrobial susceptibility of pigmented and unpigmented colonial variants of *Mycobacterium avium*. *J Clin Microbiol* **27**:2459-2456.

13. **Tenover, F. C., R. D. Arbeit, R. V. Goering, P. A. Mickelsen, B. E. Murray, D. H. Persing, and B. Swaminathan.** 1995. Interpreting chromosomal DNA restriction patterns produced by pulsed-field gel electrophoresis: criteria for bacterial strain typing. *J.Clin.Microbiol.* **33**:2233-2239.
14. **Thibault, V. C., M. Grayon, M. L. Boschioli, C. Hubbans, P. Overduin, K. Stevenson, M. C. Gutierrez, P. Supply, and F. Biet.** 2007. New variable number tandem repeat markers for typing *M. avium* subsp. *paratuberculosis* and *M. avium* strains: comparison with IS900 RFLP and IS1245 RFLP typing. *J.Clin.Microbiol.JCM.*
15. **Turenne, C. Y., M. Semret, D. V. Cousins, D. M. Collins, and M. A. Behr.** 2006. Sequencing of *hsp65* Distinguishes among Subsets of the *Mycobacterium avium* Complex. *J.Clin.Microbiol.* **44**:433-440.
16. **Von Reyn, C. F., R. D. Arbeit, C. R. Horsburgh, M. A. Ristola, R. D. Waddell, S. M. Tvaroha, M. Samore, L. R. Hirschhorn, J. Lumio, A. D. Lein, and M. R. Grove.** 2002. Sources of Disseminated *Mycobacterium avium* Infection in AIDS. *Journal of Infection* **44**:166-170.
17. **Von Reyn, C. F., J. N. Maslow, T. W. Barber, J. O. I. Falkinham, and R. D. Arbeit.** 1994. Persistent colonisation of potable water as a source of *Mycobacterium avium* infection in AIDS. *Lancet* **343**:1137-1141.
18. **Von Reyn, C. F., R. D. Waddell, T. Eaton, R. D. Arbeit, and et al.** 1993. Isolation of *Mycobacterium avium* complex from water in the United States, Finland, Zaire, and Kenya. *J Clin Microbiol* **31**:3227-3230.
19. **Yoder, S., C. Argueta, A. Holtzman, T. Aronson, O. G. Berlin, P. Tomasek, N. Glover, S. Froman, and G. Stelma, Jr.** 1999. PCR Comparison of *Mycobacterium avium* Isolates Obtained from Patients and Foods. *Appl.Environ.Microbiol.* **65**:2650-2653.
